# Supplementary material for: Potential economic impacts from improving breastfeeding rates in the UK
Source: HighWire-hosted journal article supplement (doi:10.1136/archdischild-2014-306701), 2014-12-04
Supplement: archdischild-2014-306701supp_figure.pdf [file archdischild-2014-306701supp_figure.pdf]

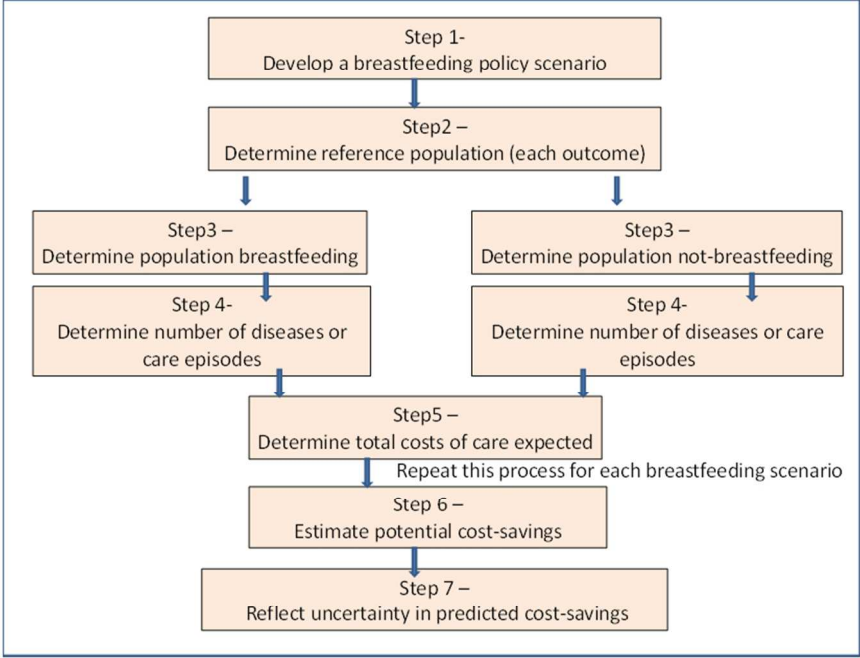

[Web Appendix] Figure 1: The 7-step framework to estimate cost-savings due to increased breastfeeding rates in the UK
